# Supplementary material for: Filling the Antibody Pipeline in Allergy: PIPE Cloning of IgE, IgG1 and IgG4 against the Major Birch Pollen Allergen Bet v 1
Source: MDPI journal article supplement (doi:10.3390/ijms21165693), 2020-08-08
Supplement: s1 [file s1]

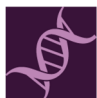

## 1 Supplementary Material – Uncropped Gel Images

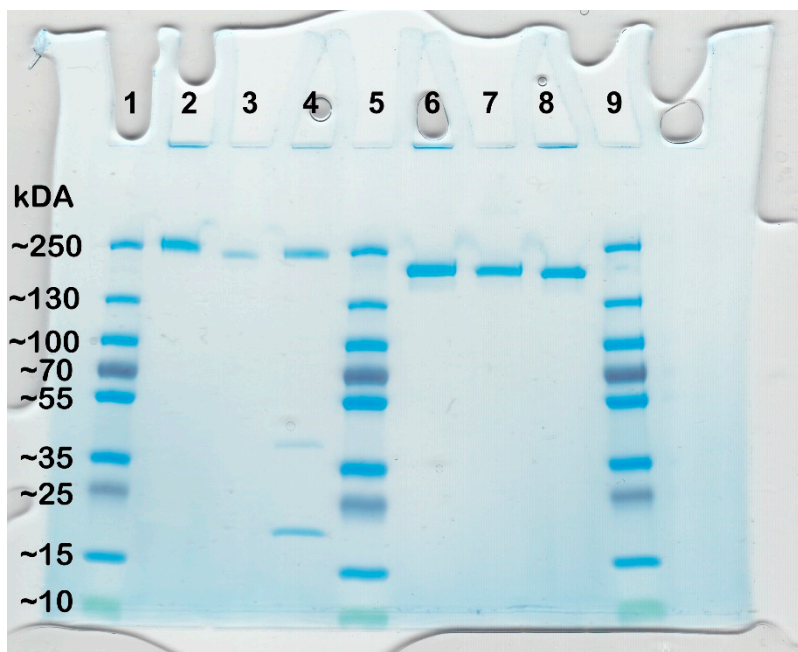

**Figure S1.** Uncropped gel image of SDS–PAGE, non–reducing conditions. 1, Marker; 2, M0418 IgE; 3, Isotype IgE; 4, unrelated IgE; 5, Marker; 6, M04128 IgG<sub>1</sub>; 7, isotype IgG<sub>1</sub>; 8, unrelated IgG<sub>1</sub>; 9, Marker.

2  
3

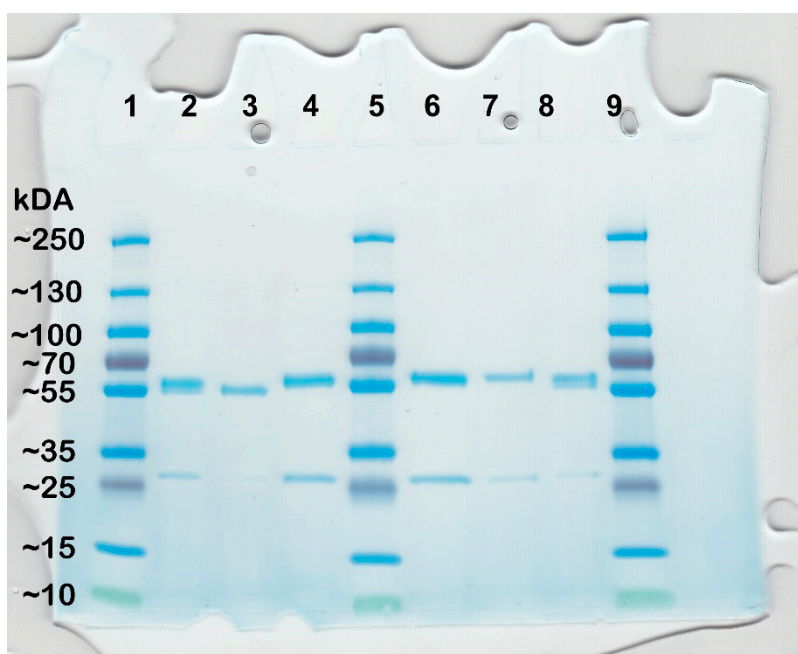

**Figure S2.** Uncropped gel image of SDS–PAGE, reducing conditions. 1, Marker; 2, M0418 IgG<sub>1</sub>; 3, Isotype IgG<sub>1</sub>; 4, unrelated IgG<sub>1</sub>; 5, Marker; 6, M04128 IgG<sub>4</sub>; 7, isotype IgG<sub>4</sub>; 8, unrelated IgG<sub>4</sub>; 9, Marker

4  
5  
6  
7

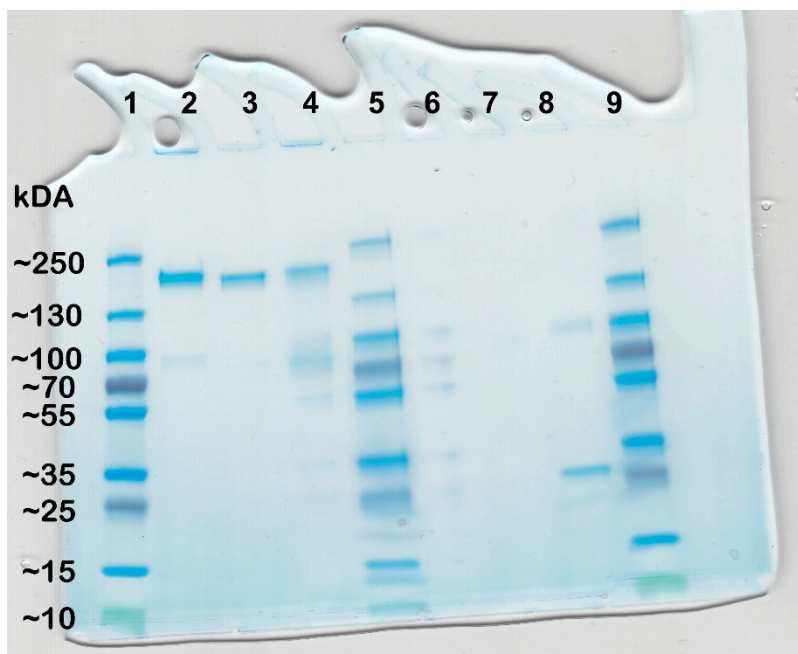

Figure S3. Uncropped gel image of SDS-PAGE, non-reducing conditions (left); 1, Marker; 2, M0418 IgG<sub>4</sub>; 3, Isotype IgG<sub>4</sub>; 4, unrelated IgG<sub>4</sub>; 5-9: irrelevant, was repeated.

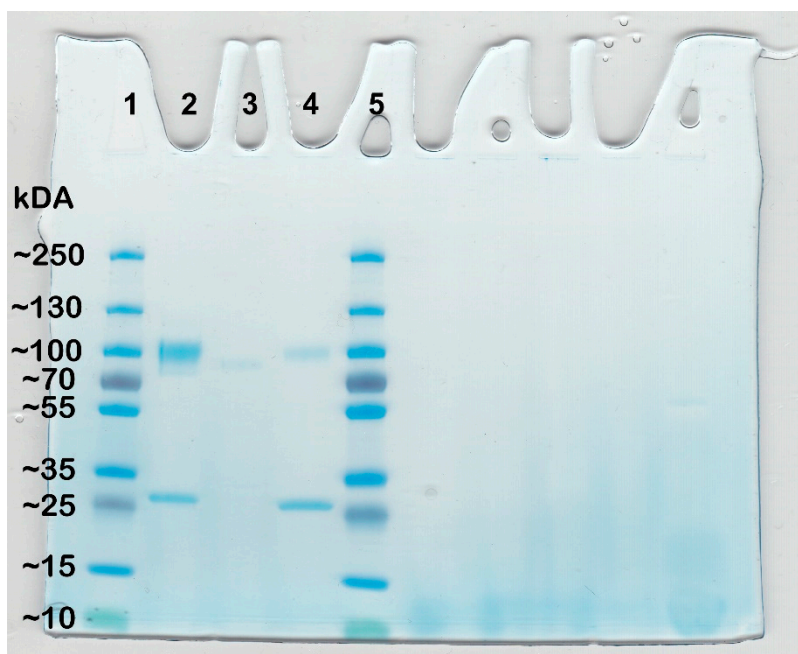

Figure S4. Uncropped gel image of SDS-PAGE, reducing conditions. 1, Marker; 2, M0418 IgE; 3, Isotype IgE; 4, unrelated IgE; 5, Marker.

8

9 Supplementary Material – FcεRI and CD23 Expression of U937 and RPMI-8866 Cells  
10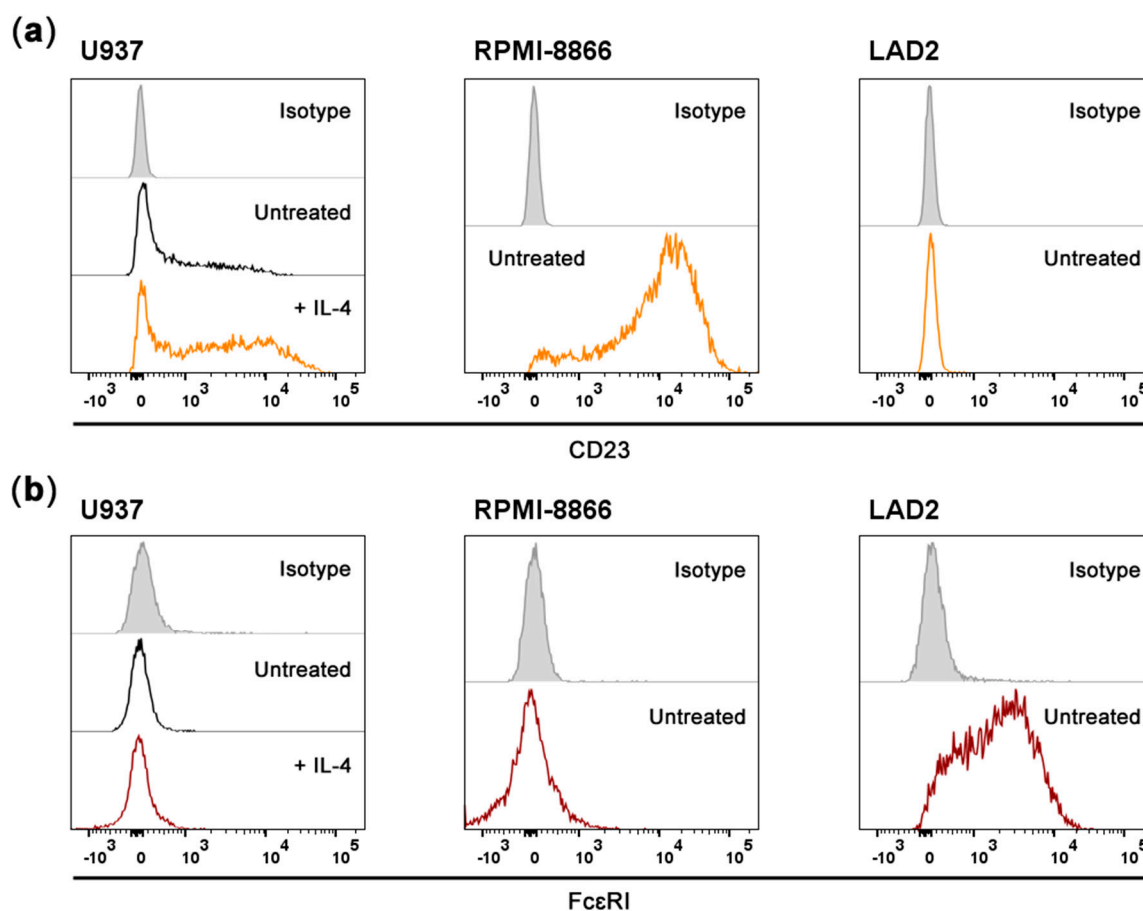

**Figure S5.** IgE receptor expression of model cell lines U937 and RPMI-8866. (a) U937 monocytes express a moderate level of the low-affinity receptor CD23, which is enhanced by priming with IL-4. RPMI-8866 cells express high levels of CD23, whereas the control mast cell line LAD2 is CD23-negative. (b) U937 monocytes and RPMI-8866 cells are high-affinity receptor FcεRI-negative, as compared to the control mast cell line LAD2.

11

12
